# Supplementary material for: Deep Space Network utilization for flight projects, calendar year 1981
Source: Royal Society of Chemistry journal article supplement (doi:10.1039/d2ay00692h), 1982-11-15
Supplement: d2ay00692h1.pdf [file d2ay00692h1.pdf]

## **Colorimetric sensor array based on CoOOH nanoflakes for rapid discrimination of antioxidants in food**

Yuling Li<sup>a</sup>, Xiaotong Wu<sup>a</sup>, Zixuan Wu<sup>a</sup>, Mingmin Zhong<sup>a</sup>, Xiaoping Su<sup>a</sup>, Youai Ye<sup>a</sup>, Yan Liu<sup>b</sup>, Lei Tan<sup>c,\*</sup>, Yong Liang<sup>a,\*</sup>

<sup>a</sup> School of Chemistry, South China Normal University, Guangzhou, 510006, China

<sup>b</sup> Guangdong Centre for Agricultural Products Quality and Safety, Guangzhou, 510230, China

<sup>c</sup> Guangzhou Center for Disease Control and Prevention, Guangzhou, 510440, China

\*Corresponding authors. [jsutanlei@gmail.com](mailto:jsutanlei@gmail.com), [liangy@scnu.edu.cn](mailto:liangy@scnu.edu.cn)

**Table S1.** Gradient elution conditions for the separation of the antioxidants

| Time (min) | Mobile phase A (%) | Mobile phase B (%) |
|------------|--------------------|--------------------|
| 0          | 50                 | 50                 |
| 5          | 50                 | 50                 |
| 15         | 20                 | 80                 |
| 20         | 20                 | 80                 |
| 25         | 10                 | 90                 |
| 27         | 50                 | 50                 |
| 35         | 50                 | 50                 |

**Table S2.** Euclidean distance between different samples

| Centroid functions | Factor 1 | Factor 2 | Factor 3 | Euclidean distances (EDs) |
|--------------------|----------|----------|----------|---------------------------|
| BHT-100 nM         | -20.152  | 4.765    | -0.276   | 8.159                     |
| BHA/TBHQ=9:1       | -18.789  | -2.92    | 2.102    |                           |
| TBHQ-100 nM        | 8.871    | 3.952    | -2.051   |                           |
| TBHQ-50 nM         | -7.358   | -7.398   | -2.759   | 6.008                     |
| Bis-100            | -12.446  | -8.235   | 0.324    |                           |
| TBHQ-500 nM        | 24.462   | -11.271  | 3.495    |                           |
| Bis-20             | 24.462   | -5.479   | -0.929   | 7.289                     |
| BHA-50 nM          | -26.703  | -0.837   | -1.498   |                           |
| Sau-100            | -28.226  | -1.125   | -0.132   |                           |
| BHA-700 nM         | 2.984    | 13.411   | 5.297    | 12.89                     |
| Sau-20             | 1.02     | 7.771    | -6.125   |                           |

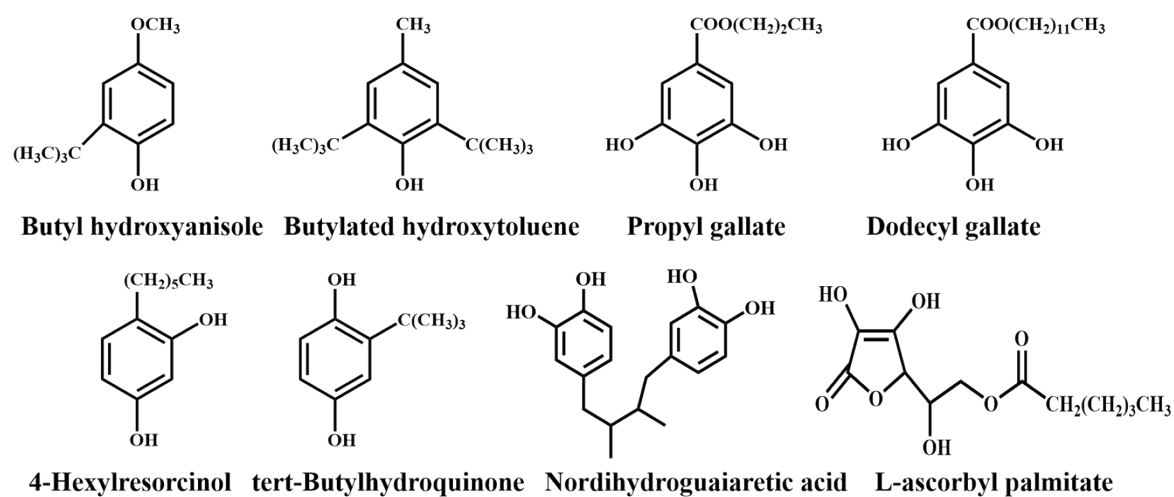

Figure S1. Chemical structures of the eight phenolic antioxidants.

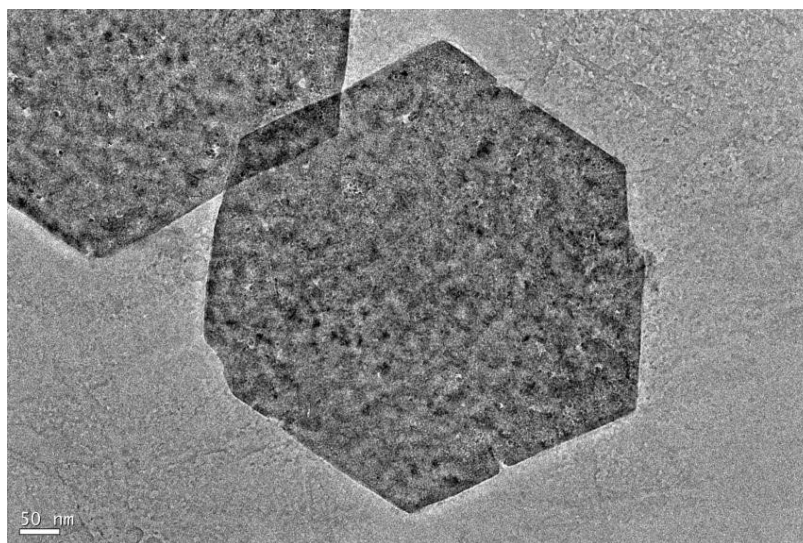

**Figure S2.** The high-resolution transmission electron microscope image of the CoOOH nanoflakes.

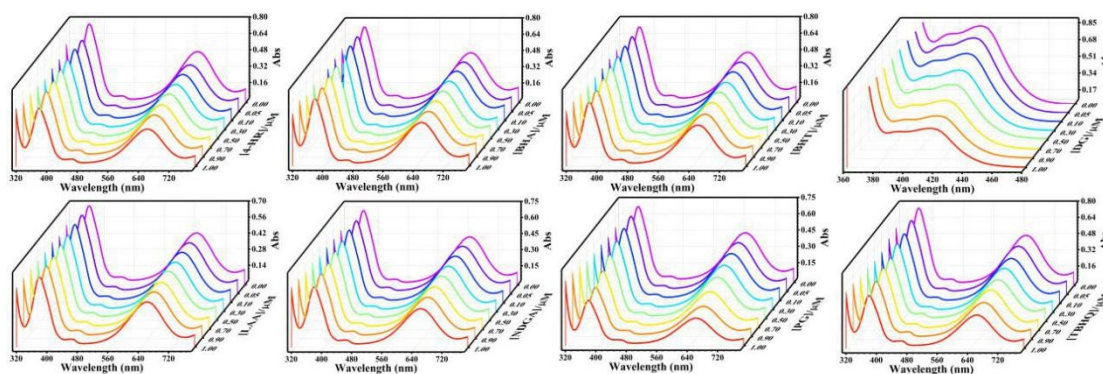

**Figure S3.** Typical absorption spectra for monitoring the catalytic oxidation of TMB in the presence of CoOOH nanozymes with various concentrations of 4-HR, BHA, BHT, DG, L-AA, NDGA, PG and TBHQ.

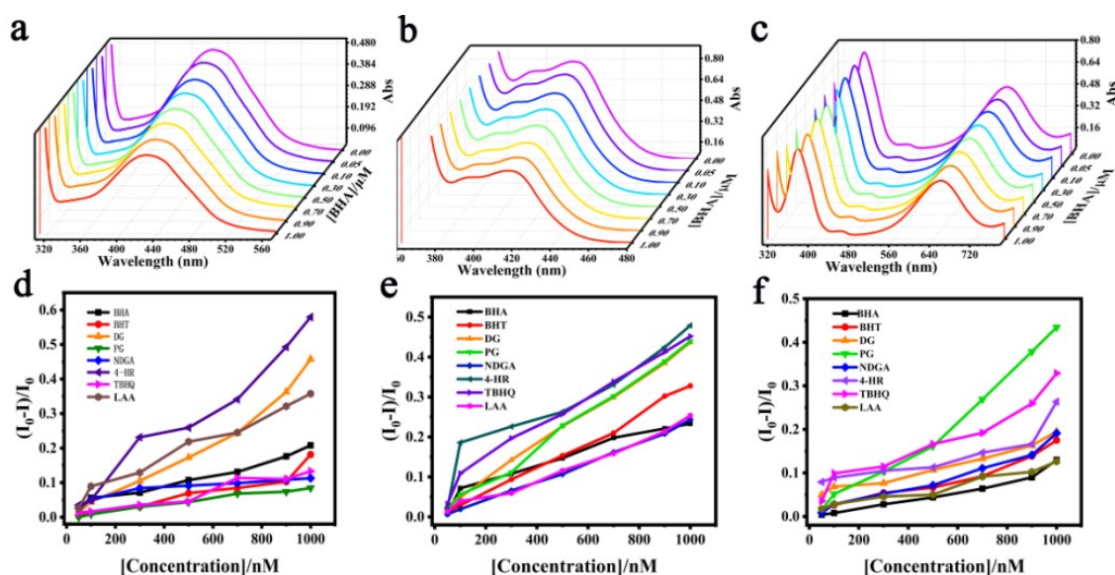

**Figure S4.** Typical absorption spectra for monitoring the catalytic oxidation of OPD (a), ABTs (b), and TMB (c) in the presence of CoOOH nanozymes with various concentrations of BHA. Chromogenic activity of OPD (d), ABTs(e), and TMB (f) after incubation with different concentrations of the eight antioxidants.

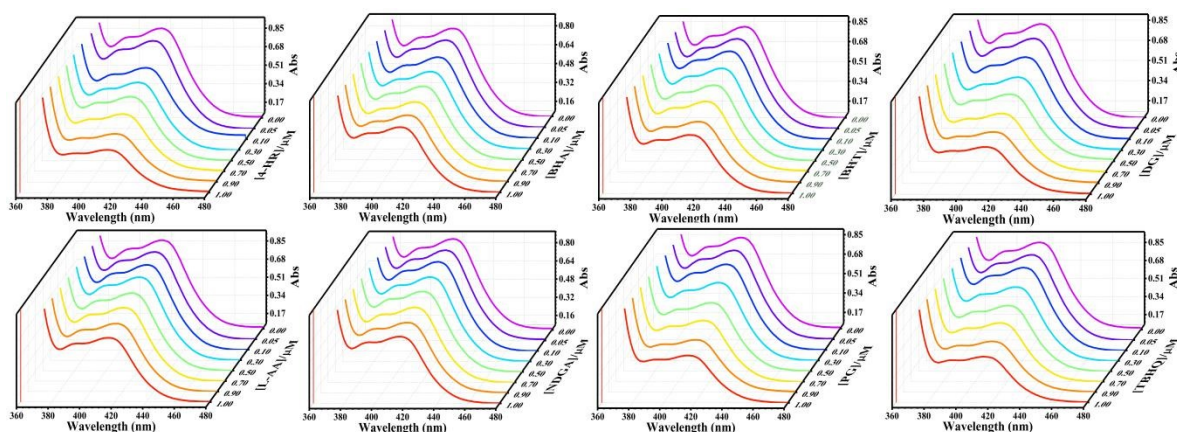

**Figure S5.** Typical absorption spectra for monitoring the catalytic oxidation of ABTs in the presence of CoOOH nanozymes with various concentrations of 4-HR, BHA, BHT, DG, L-AA, NDGA, PG and TBHQ.

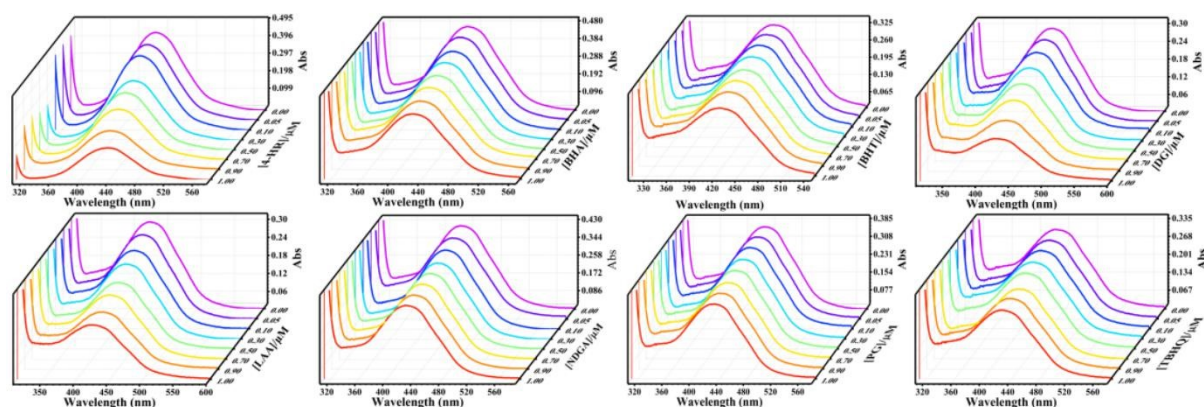

**Figure S6.** Typical absorption spectra for monitoring the catalytic oxidation of OPD in the presence of CoOOH nanozymes with various concentrations of 4-HR, BHA, BHT, DG, L-AA, NDGA, PG and TBHQ.

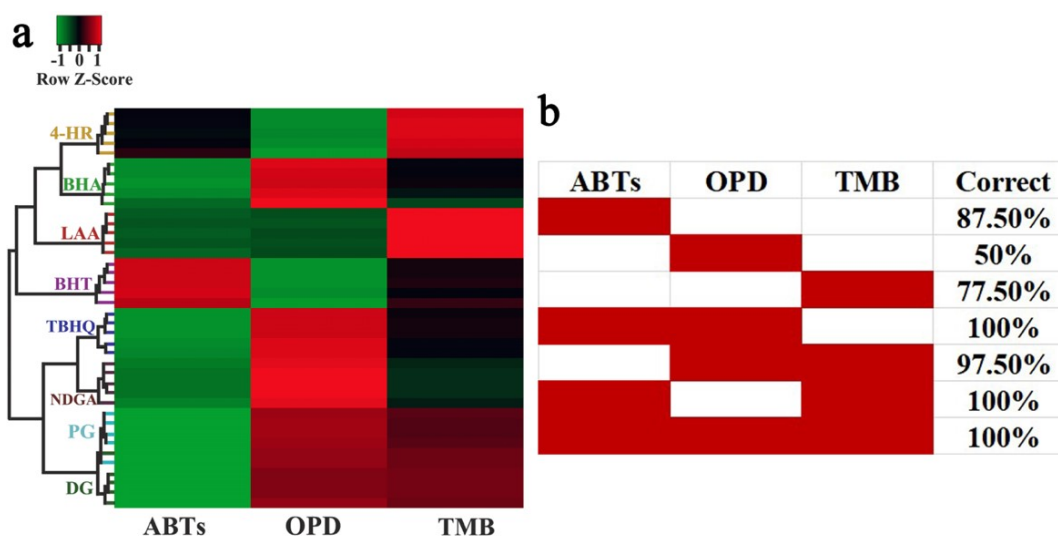

**Figure S7.** Heat plot of the absorption signatures of 50 nM antioxidants. Five replicates are shown per antioxidant(a) and The classification accuracy for identifying antioxidants (each at 50 nM) using an individual Chromogenic substrate (ABTs, OPD, or TMB) and the combination of three substrates.

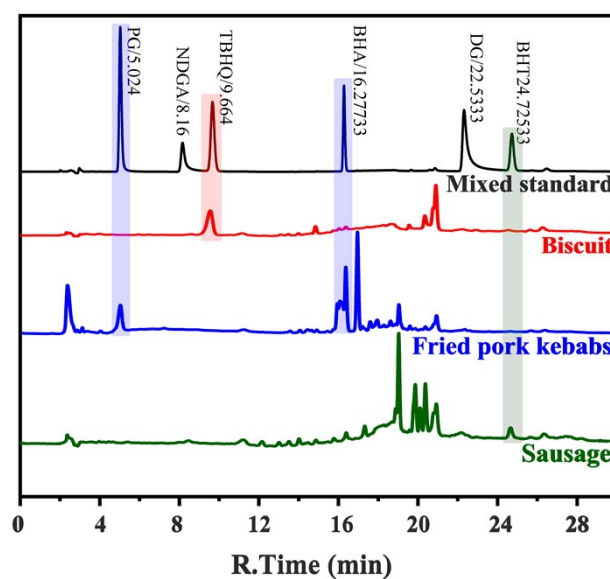

**Figure S8.** Determination of the antioxidants in biscuits, sausages and fried meat kebabs by high-performance liquid chromatography.

**Table S3.** Result of unknown samples detection using a LDA algorithm.

| Sample             | Concentration (nM) | Number of samples | Correctly identified | Accuracy (%) |
|--------------------|--------------------|-------------------|----------------------|--------------|
| TBHQ               | 50                 | 5                 | 5                    | 100          |
|                    | 100                | 5                 | 5                    | 100          |
|                    | 300                | 5                 | 5                    | 100          |
|                    | 500                | 5                 | 5                    | 100          |
|                    | 700                | 5                 | 5                    | 100          |
|                    | 900                | 5                 | 5                    | 100          |
|                    | 1000               | 5                 | 5                    | 100          |
|                    | 50                 | 5                 | 5                    | 100          |
| BHT                | 100                | 5                 | 5                    | 100          |
|                    | 300                | 5                 | 5                    | 100          |
|                    | 500                | 5                 | 5                    | 100          |
|                    | 700                | 5                 | 5                    | 100          |
|                    | 900                | 5                 | 5                    | 100          |
|                    | 1000               | 5                 | 5                    | 100          |
|                    | 100                | 5                 | 4                    | 80           |
|                    | 20                 | 5                 | 5                    | 100          |
| Sausage (dilution) | 100                | 5                 | 4                    | 80           |
|                    | 20                 | 5                 | 5                    | 100          |
| PG                 | 50                 | 5                 | 4                    | 80           |
|                    | 100                | 5                 | 5                    | 100          |
|                    | 300                | 5                 | 5                    | 100          |
|                    | 500                | 5                 | 5                    | 100          |
|                    | 700                | 5                 | 5                    | 100          |
|                    | 900                | 5                 | 5                    | 100          |
|                    | 1000               | 5                 | 5                    | 100          |
|                    | 1000               | 5                 | 5                    | 100          |

|            |       |     |     |      |
|------------|-------|-----|-----|------|
|            | 50    | 5   | 5   | 100  |
|            | 100   | 5   | 5   | 100  |
|            | 300   | 5   | 5   | 100  |
| BHA        | 500   | 5   | 5   | 100  |
|            | 700   | 5   | 5   | 100  |
|            | 900   | 5   | 5   | 100  |
|            | 1000  | 5   | 5   | 100  |
| fried pork | 200   | 5   | 5   | 100  |
| kebabs     | 100   | 5   | 5   | 100  |
| (dilution) | 20    | 5   | 5   | 100  |
|            | Total | 175 | 172 | 98.3 |

## Reference

[1] Compilation of National Food Safety Standards, 2014.
